# Supplementary material for: Epidemiological and Clinical Characteristics, Antifungal Susceptibility, and MLST-Based Genetic Analysis of Cryptococcus Isolates in Southern Taiwan in 2013–2020
Source: MDPI journal article supplement (doi:10.3390/jof8030287), 2022-03-11
Supplement: s1 [file s1]

A

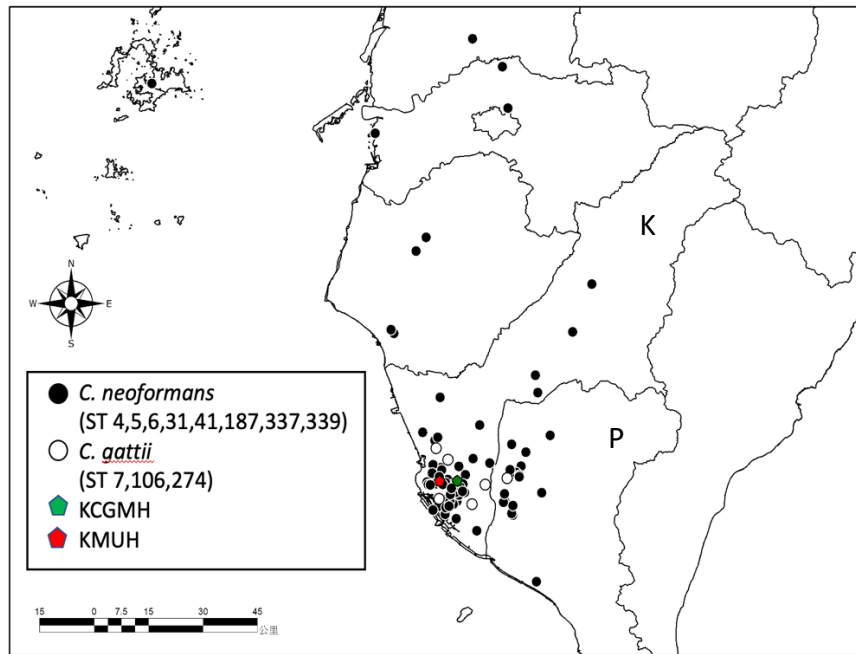

B

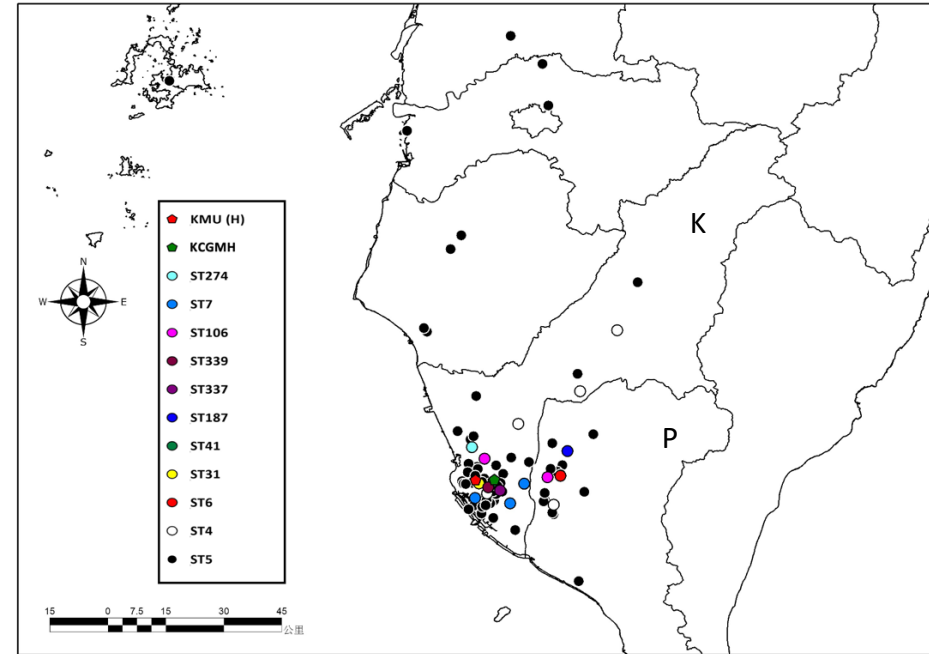

**Supplementary Figure S1.** (A) *Cryptococcus gattii* were identified from patients who lived in Kaohsiung and Pingtung. ST5 was identified in a patient from Penghu. (B) There were 8 *C. neoformans* and 3 *C. gattii* STs identified from patients who lived in Kaohsiung and Pingtung.

KCGMH, Kaohsiung Chang Gung Memorial Hospital; Kaohsiung Medical University Hospital (KMUH)

K, Kaohsiung; P, Pingtung

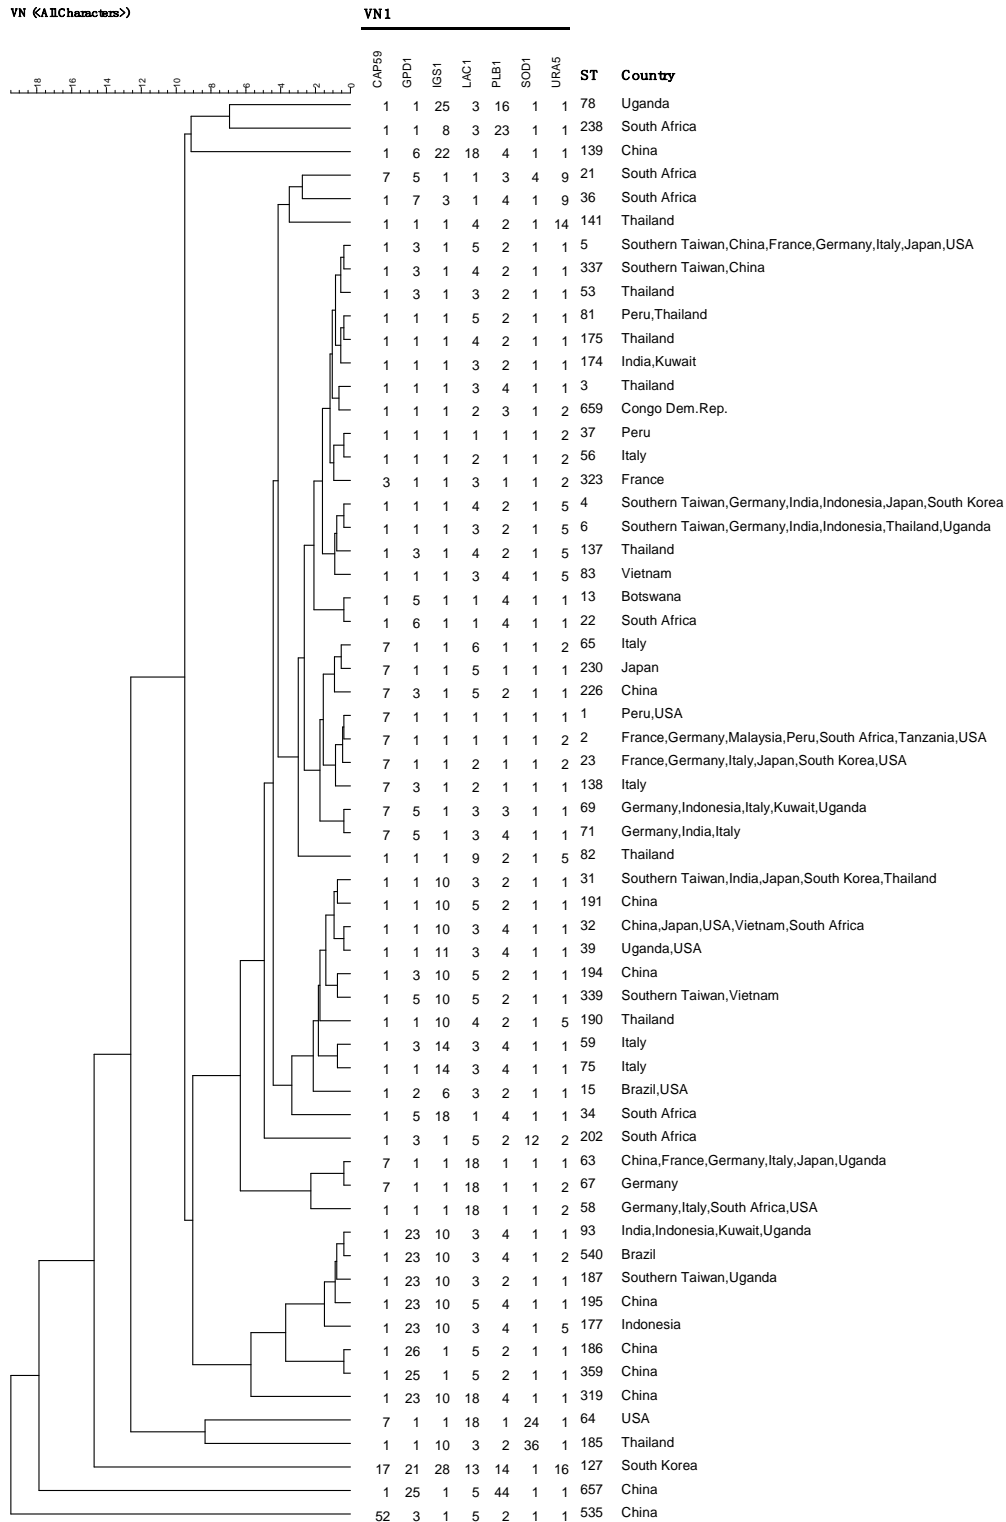

**Supplementary Figure S2.** The geographical origins of *C. neoformans* VNI STs were obtained from the present study and the MLST database.

A

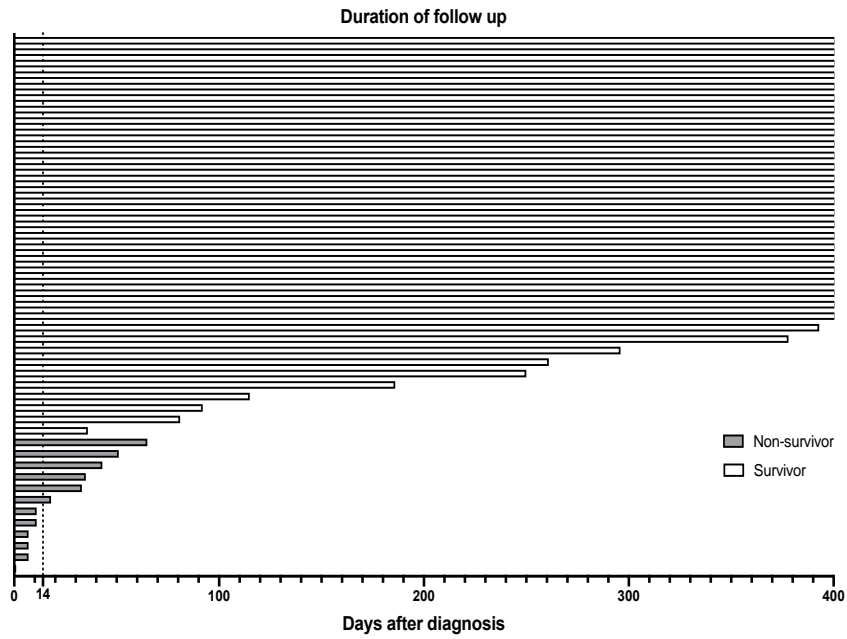

B

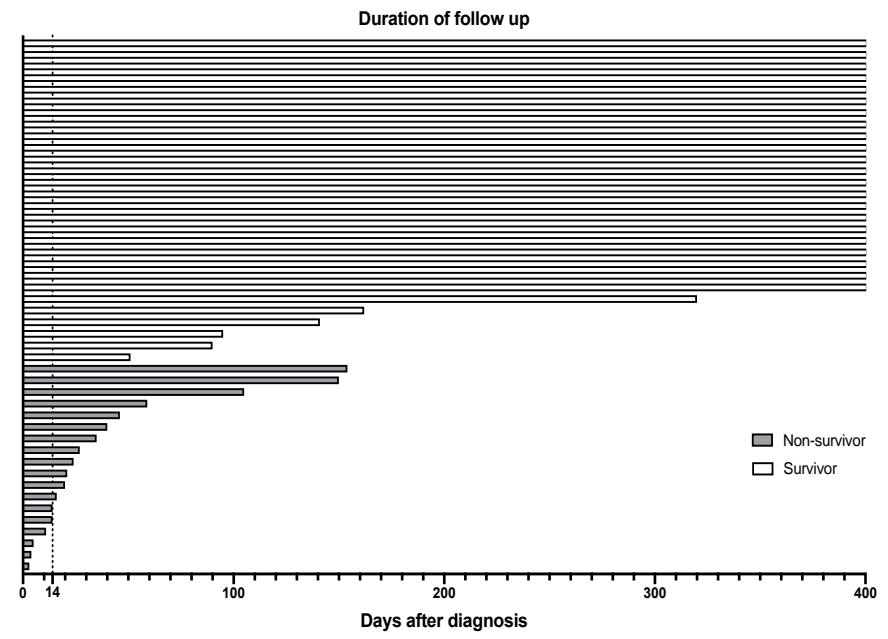

**Supplementary Figure S3.** Duration of follow up of the patients with cryptococcal meningoencephalitis during 2013-2020 (A) and 2000-2010

(B).
